# Supplementary material for: Colluvial deposits as a possible weathering reservoir in uplifting mountains
Source: Copernicus journal article supplement (doi:10.5194/esurf-2017-48), 2017-08-28
Supplement: Supplementary file [file esurf-2017-48-RC1-supplement.pdf]

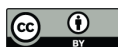

## Colluvial deposits as a possible weathering reservoir in uplifting mountains

Sébastien Carretier<sup>1</sup>, Yves Godderis<sup>1</sup>, Javier Martinez<sup>2</sup>, Martin Reich<sup>2,3</sup>, and Pierre Martinod<sup>2,1</sup>

<sup>1</sup>GET, IRD, CNRS, CNES, OMP, UPS, Université de Toulouse, 14 avenue E. Belin, F-31400, Toulouse, France

<sup>2</sup>Department of Geology, FCFM, Universidad de Chile, Santiago, Chile

<sup>3</sup>Andean Geothermal Center of Excellence (CEGA), FCFM, Universidad de Chile, Santiago.

Correspondence to: S. Carretier ([sebastien.carretier@get.omp.eu](mailto:sebastien.carretier@get.omp.eu))

**Abstract.** The role of mountain uplift in the global climate over geological times is controversial. At the heart of this debate is the capacity of rapid denudation to drive silicate weathering, a CO<sub>2</sub> consumer. Here we present the results of a 3D model that couples erosion and weathering during mountain uplift, in which the weathered material is traced during its stochastic transport from the hillslopes to the mountain outlet. During mountain uplift, the erosion rate increases and the climate cools, which thins the regolith and produces a hump in the weathering rate evolution. Nevertheless, lateral river erosion drives mass wasting and the temporary storage of colluvial deposits on the valley borders. This new reservoir is comprised of fresh material which has a residence time ranging from several years up to several thousand years. During this period, the weathering of colluvium sustains the mountain weathering flux at a significant level. The relative weathering contribution of colluvium depends on the area covered by regolith on the hillslopes. For mountains sparsely covered by regolith during cold periods, colluvium produce most of the simulated weathering flux for a large range of erosion parameters and precipitation rate patterns. In addition to other reservoirs such as deep fractured bedrock, colluvial deposits may help to maintain a substantial and constant weathering flux in rapidly uplifting mountains during cooling periods.

### 1 Introduction

Mountain building steepens the relief and drives river incision and hillslope erosion. Fresh minerals are exposed by erosion and are transformed into grains of different sizes that are subjected to weathering by meteoric water. The weathering of silicates, in particular, consumes atmospheric CO<sub>2</sub> over timescales of many thousands to millions of years (Walker et al., 1981). This erosion-driven weathering process led to the debated "uplift" theory, in which mountains play a key role in regulating the global climate over geological time (Raymo et al., 1988). Soil column models have challenged this theory by predicting that above a certain erosion rate value, minerals do not stay in the regolith long

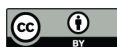

enough to significantly weather, producing a hump in the weathering-erosion relationship (Dixon  
25 et al., 2009b; Ferrier and Kirchner, 2008; Hilley et al., 2010; Gabet and Mudd, 2009). Other models  
argue that when the regolith vanishes at large erosion rates, weathering becomes significant in the  
fractured bedrock (Maher, 2011; Calmels et al., 2011; West, 2012), or that high ~~reliefs~~ consume  
more CO<sub>2</sub> than low reliefs during wetter periods (Maher and Chamberlain, 2014). Datasets from  
soil pits and riverine fluxes show a monotonic relationship between both the denudation rate and  
30 weathering rate in some cases (Millet et al., 2002; Dixon et al., 2009b; West et al., 2005), but also  
evidence a possible maximum erosion rate above which the weathering rate decreases (Dixon and  
von Blanckenburg, 2012). Recent data from the Southern Alps in New Zealand have challenged the  
existence of this erosion rate limit by demonstrating that weathering was able to continue increasing  
at the highest erosion rates when rainfall is abundant (Larsen et al., 2014). In such regions, land-  
35 slides constitute a significant weathering reservoir (Emberson et al., 2016a, b). **Downstream from**  
the Andes and Himalaya, transported minerals may continue to weather significantly in the flood-  
plain (Lupker et al., 2012; Bouchez et al., 2012; Moquet et al., 2016). As a result, the debate on the  
locus of weathering in mountains is still open and different weathering reservoirs from the hillslopes  
to plains may dominate at different stages of the mountain evolution. Until now, four main weath-  
40 ering reservoirs have been identified: soils (Dixon et al., 2009b), fractured bedrock (Calmels et al.,  
2011), basins (Bouchez et al., 2012), which also trap a considerable amount of organic carbon (Galy  
et al., 2015), and oceans (Oelkers et al., 2011). In this paper, we address the particular question of  
the relative contributions of in situ produced regolith and colluvial deposits in the weathering outflux  
of an uplifting mountain under a cooling climate.

45 **None of the available models are able** to discriminate between these weathering reservoirs. More-  
over, few models (Vanwalleghe et al., 2013; Braun et al., 2016) account for the heterogeneity of  
erosion and weathering during relief adaptation to uplift which may control the overall evolution of  
the weathering rate of a rising mountain range (Anderson et al., 2012; Cohen et al., 2013; Carretier  
50 et al., 2014). None of these models can be used to trace the weathered material through its stochastic  
displacement from ~~the hillslopes to the basins~~.

We therefore developed a dynamical model (Cidre) that accounts for the heterogeneity of ~~the ero-~~  
sion and weathering evolution **under a scenario of climate change**. This model uses a novel approach  
55 that couples the landscape evolution ~~and~~ moving clasts, which can be used to follow the weathered  
material through different weathering reservoirs. By ~~making a link between the~~ weathering processes  
at the mineral, hillslope and river scales, we provide new insights into the ~~particular~~ effect of valley  
widening and the associated colluvial deposits on weathering rates in uplifted areas.

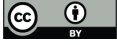

## 2 Model

60 In the following, we define "regolith" as loose material produced in situ by the conversion of fresh bedrock into weathered material.

### 2.1 Erosion-deposition model

Cidre is a c++ code that models the topography dynamics on a regular grid of square cells. Precipitation falls on the grid at a rate  $P$  [ $\text{LT}^{-1}$ ] and a multiple flow algorithm propagates the water  
 65 flux  $Q$  [ $\text{L}^3\text{T}^{-1}$ ] toward all downstream cells in proportion to the slope in each direction. A detailed description of the erosion-deposition model is given in Carretier et al. (2016) or Mouchene et al. (2017). We recall here the main parameters.

The elevation  $z$  (river bed or hillslope surface) changes on each cell (size  $dx$ ) according to the  
 70 balance between erosion  $\epsilon$  [ $\text{LT}^{-1}$ ], deposition  $D$  [ $\text{LT}^{-1}$ ], sediment discharge per unit length from lateral (bank) erosion  $q_{sl}$  [ $\text{L}^2\text{T}^{-1}$ ] and uplift  $U$  [ $\text{LT}^{-1}$ ] (e.g. Davy and Lague, 2009):

$$\frac{\partial z}{\partial t} = -\epsilon_r - \epsilon_h + D_r + D_h - \frac{dq_{sl}}{dx} + U \quad (1)$$

and we define (Davy and Lague, 2009; Carretier et al., 2016)

$$\epsilon_r = K q^m S^n \text{ for river processes} \quad (2)$$

$$75 \quad \epsilon_h = \kappa S \text{ for hillslope processes} \quad (3)$$

where  $K$  [ $\text{T}^{-0.5}$ ] and  $\kappa$  [ $\text{LT}^{-1}$ ] are lithology-dependent (different for bedrock or regolith/sediment) erosion parameters,  $S$  is the slope,  $q$  [ $\text{L}^3\text{T}^{-1}$ ] is the water discharge per stream unit width,  $m$  and  $n$  are positive exponents, and

$$D_r = \frac{q_{sr}}{\xi q} \text{ for river processes} \quad (4)$$

$$80 \quad D_h = \frac{\frac{q_{sh}}{dx}}{1 - (S/S_c)^2} \text{ for hillslope processes} \quad (5)$$

where  $q_{sr}$  and  $q_{sh}$  are the incoming river and hillslope sediment fluxes (total  $q_s = q_{sr} + q_{sh}$ ) per unit width [ $\text{L}^2\text{T}^{-1}$ ],  $\xi$  is river transport length parameter [ $\text{T L}^{-1}$ ] and  $S_c$  is a slope threshold. The  
 deposition fluxes on a cell are a fraction of the incoming sediment. When the local  $q$  and  $S$  values  
 are larger, less sediment eroded from upstream will deposit on the cell. The sediment leaving a cell  
 85 is spread in the same way as water, i.e. proportionally to the downstream slopes.

Flowing water in each direction can erode lateral cells perpendicular to that direction. The lateral sediment flux per unit length  $q_{sl}$  [ $\text{L}^2\text{T}^{-1}$ ] eroded from a lateral cell is defined as a fraction of the

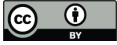

river sediment flux  $q_{sr}$  [ $L^2T^{-1}$ ] in the considered direction (e.g. Murray and Paola, 1997; Nicholas  
 90 and Quine, 2007):

$$q_{sl} = \alpha q_{sr} \quad (6)$$

where  $\alpha$  is a bank erodibility coefficient.  $\alpha$  is specified for loose material (regolith or sediment) and is implicitly determined for bedrock layers proportionally to their "fluvial" erodibility such that  $\alpha_{loose}/\alpha_{bedrock} = K_{loose}/K_{bedrock}$  ( $K$  from Equation 2). If a regolith or sediment covers the  
 95 bedrock of a lateral cell,  $\alpha$  is weighted by its respective thickness above the target cell.

Following different authors, we assume that the regolith production rate follows a humped law, so that there is an optimum thickness at which the regolith production rate is at its maximum (Strudley et al., 2006)

$$100 \quad w = w_o (e^{-B/d_1} - k_1 e^{-B/d_2}) \quad (7)$$

where  $d_1$  and  $d_2$  [L] are the attenuation depths,  $k_1$  is a non-dimensional coefficient, and  $w_o$  [ $L T^{-1}$ ] is the regolith production rate for the exposed bedrock.

We also let  $w_o$  depend on temperature  $T$  and precipitation rate  $P$ , following White and Blum  
 105 (1995) and Dixon et al. (2009a) among others:

$$w_o = k_w \frac{P}{P_o} \left[ e^{\frac{-E_a}{R} \left( \frac{1}{T} - \frac{1}{T_o} \right)} \right] \quad (8)$$

where  $k_w$  is a factor with the dimension of a weathering rate [ $L T^{-1}$ ],  $P$  [ $L T^{-1}$ ] is the amount of water entering the regolith (equal here to the rainfall rate),  $P_o$  is the water flow reference value (1 m  $a^{-1}$  in this study),  $E_a$  is the activation energy corresponding to the mineral that controls the weathering front advance,  $T_o$  is a reference temperature (298 K),  $T$  is the local temperature expressed in  
 110 Kelvin and  $R$  is the gas constant.

Equations 7 and 8 are similar to the regolith production model tested by Norton et al. (2014), and were also used in Carretier et al. (2014). Nevertheless, except in rare studies (Wilkinson et al.,  
 115 2005), no data fully support (or exclude) the humped function in Equation 7. The existence of an optimum regolith thickness has been conceptually justified as resulting from water pumping by plants, or an optimum residence time of water within a porous soil to dissolve minerals (Gilbert, 1877). The exponential decrease in Equation 8 emerges from a reactive-transport model when diffusion dominates (Lebedeva et al., 2010). However, for thick regoliths ( $>> 1$  m), their thickening may mainly



depend on groundwater discharge (e.g. Maher, 2010; Maher and Chamberlain, 2014; Hilley et al., 2010; Rempe and Dietrich, 2014). Lebedeva et al. (2010) and Braun et al. (2016) showed that in the absence of uplift and erosion, this type of model predicts that the regolith thickens as  $\sqrt{t}$ . This means that the regolith production rate  $w$  varies as  $1/B$ . Compared with the exponential trend of Equation 7, this  $1/B$  trend predicts a much slower attenuation of the regolith development when it thickens. This allows very thick ( $>100$  m) regoliths to develop within a realistic period of time (Braun et al., 2016). Alternatively, if the weathering front advance is controlled by the rate of mineral fracturing, then the regolith production rate is predicted to be constant (Fletcher et al., 2006). As we are analysing the effect of erosion on weathering, the  $1/B$  depth attenuation for thick regoliths is not considered here. Nevertheless, we show one experiment that uses this  $1/B$  attenuation to illustrate that the particular model for local regolith development is not crucial for our conclusions.

The dependence of the local regolith production on the temperature and precipitation rate is suggested by silicate weathering outfluxes on the soil and catchment scale (White and Blum, 1995; Gaillardet et al., 1999; Dupré et al., 2003; Oliva et al., 2003; Riebe et al., 2004; West, 2012), and experimental data (Brantley et al., 2008). Dixon et al. (2009a) showed that Equation 8 fits saprolite data in the western Sierra Nevada Mountains in California. Nevertheless, Maher (2010, 2011) and Maher and Chamberlain (2014) argued that in many mountainous situations, the weathering rate should essentially and linearly depend on the water flow in the soil, with a minor effect of temperature. In Equation 8, the linear dependency between the regolith production rate and runoff and the weaker dependence on temperature are consistent with that view, although our model clearly misses the control of water flux partitioning between the surface and ground on the regolith development rate and pattern (Maher and Chamberlain, 2014; Rempe and Dietrich, 2014; Braun et al., 2016; Schoonejans et al., 2016). The drawback of Equations 7, 8 is that they are parametrical and not truly physically based. Nevertheless, given the lack of consensus, we assume the form of these laws and test the effect of varying their parameters. In particular, we test the difference between the humped form and the exponential form ( $k_1 = 0$ ) of this law (Heimsath et al., 1997).

## 2.2 Clast weathering

A clast has a specified radius  $r$ , with no particular limitation, between the size of a small mineral and a large cobble. Its probability to be detached, deposited or to pass through a cell depends on its size and on the associated fluxes calculated by Cidre on each cell (see Carretier et al., 2016). With this algorithm, the spreading of the different clasts depends on the relative magnitude of diffusive and advective transport (Equations 2 to 5), while the mean population transport rate is determined by the transport discharge  $q_s$  calculated in Cidre (Carretier et al., 2016). This model generates a clast residence time distribution that evolves from the soil to the valley.

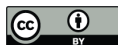

Clast weathering is a new feature of our model. Compared to previous versions, clast dissolution allows us to model a weathering flux and not only a mean bedrock-to-regolith conversion rate (Caretier et al., 2014). The weathering of the clast begins when the clast enters the regolith or when it is detached from the bedrock. For a clast made up of only one mineral, the volumetric dissolution rate

160  $w_m$  ( $\text{L}^3\text{T}^{-1}$ ) is

$$w_m = \frac{P}{P_o} [V_m \lambda 4\pi r_m^2 k_m e^{E_a(\frac{1}{R298.15} - \frac{1}{RT})}] \quad (9)$$

where  $V_m$  is the molar volume [ $\text{L}^3\text{N}^{-1}$ ],  $\lambda$  is a non-dimensional roughness coefficient defined by White and Brantley (2003) (see also White et al., 2008) and  $k_m$  is a dissolution parameter depending on each mineral [ $\text{N}\text{L}^{-2} \text{T}^{-1}$ ] (e.g. Brantley et al., 2008). The other parameters are defined in

165 Equation 8. The product  $\lambda 4\pi r_m^2$  is the reactive surface. The second part of this equation comes from experimental laws of mineral dissolution (e.g. Brantley et al., 2008). The first part, with the runoff dependence ( $\frac{P}{P_o}$ ), accounts for the linear increase in the dissolution rate with water discharge (Maher, 2010). As for the regolith production law, we acknowledge that it is a simplification to assume a linear correlation between groundwater discharge in the soil and runoff.

170 If a clast is made up of different minerals, their proportions are specified at the beginning ( $\chi_{mo}$ ) and then evolve during their lifetime ( $\chi_m$ ). Modelling a complex mineralogical texture with a subdivision into different grains would be intractable in practice. In a simplified model, the main issue is to define a reactive surface for each mineral type. Given that minerals are spread into different grains

175 within the clast, this surface is larger than the surface of a simple sphere made up of a particular mineral (White and Brantley, 2003).

In order to take this reactive surface into account in the most simple manner, each mineral type is converted to an "equivalent" sphere with radius  $r_m$  including the mineral and "virtual" vacuum.

180 In addition, this sphere surface is multiplied by the roughness coefficient  $\lambda$  to define the reactive surface (Figure 1). The sphere geometry is chosen for its simplicity. The "virtual" vacuum implies that the reactive surface of each mineral is larger than the surface of a "solid" sphere made up of this mineral only (even if  $\lambda = 1$ ).  $\lambda$  is an adjusted factor that may account for the complex geometry of the crystals within the clast. This formulation also respects the fact that when smaller proportions of

185 a mineral occur within the clast, its specific surface is larger (reactive surface over mineral mass).

At the beginning of the process, each "equivalent" sphere has the same radius as the clast (Figure 1).

190 The total dissolution rate for the clast  $w_c$  [ $\text{L}^3\text{T}^{-1}$ ] is then



$$w_c = \sum_m \chi_{mo} w_m \quad (10)$$

Over a time step, the volume  $\delta v_m$  [L<sup>3</sup>] lost by one particular mineral is

$$\delta v_m = \chi_{mo} w_m dt \quad (11)$$

and the total volume lost by the clast  $\delta v_c$  [L<sup>3</sup>] is

$$195 \quad \delta v_c = \sum_m \delta v_m \quad (12)$$

The "solid" (real) volume lost by each mineral  $\delta v_m$  is subtracted from its previous volume to calculate the new mineral volume  $v_m$ . The new mineral radius  $r_m$  is then calculated considering an "equivalent" sphere incorporating the solid and virtual vacuum of volume  $\frac{v_m}{\chi_{mo}}$ :

$$r_m = \left( \frac{3}{4\pi} \frac{v_m}{\chi_{mo}} \right)^{\frac{1}{3}} \quad (13)$$

200 The sum of the new "solid" mineral volumes  $v_m$  is the new "solid" clast volume. The new clast radius is the radius of the largest "equivalent" sphere of its constitutive minerals (Figure 1). Doing this, we assume that the largest mineral forms a mass that includes the other minerals.

This formulation was also designed to respect a basic mass balance: a clast of a given size constituted initially of one mineral (for example 100% of albite) evolves exactly in the same way as if it was constituted of different proportions of the same mineral (for example 40% of albite + 50% of albite + 10% of albite). This equivalence is achieved by using the initial mineral fraction  $\chi_{mo}$  in Equation 13 to define each "equivalent sphere".

210 If a clast includes minerals of contrasting weathering rates, for example albite and quartz, the rapid dissolution of albite ends up with a porous clast made up of a vacuum within the quartz. The true clast volume is therefore larger than the "solid" sphere corresponding to the mass of the quartz only, which is reproduced well by Equation 13. The porosity increases in these clasts, consistent with reality. Obviously, this approach supposes that the initial clast does not lose its cohesion and is  
 215 not divided into different mineral grains, which can occur in nature.

This approach is probably less realistic when the clast size exceeds several centimetres. In that case, the advance of the annular weathering front may control the clast volume that is effectively being weathered (Lebedeva et al., 2010). This type of front could be simply introduced into the



220 model in the future based on the results of Lebedeva et al. (2010). In the present form, the predicted dissolved volume of such large clasts is therefore probably a maximum volume.

The weathering rate of the clasts does not depend on the depth in the regolith in the present version. The removal of water by plants, changes in the regolith porosity, pCO<sub>2</sub>, groundwater flow  
 225 velocity, pH, sensitivity of the surface temperature variations, clay precipitation, etc., can modify the weathering rate according to the depth. In the future, this could be accounted for by, for example, modulating the weathering rate by the same humped law (Equation 7) used for regolith production (Vanwalleghe et al., 2013).

230 Nevertheless, to validate our approach in a simple case, we simulated weathering on marine terraces in Santa Cruz, California and found that the results agree with empirical observations (Supplementary Material).

### 2.3 Integration at the cell and grid scales

~~The philosophy developed here is to use the available limited~~ information provided by the clasts  
 235 present on some of the cells to estimate the chemical weathering outflux of the landscape. Weathering first occurs in the regolith and then during clast transport on the hillslopes and in rivers. Whereas the weathering of all clasts is calculated at each time step, integrated weathering at the model scale can be calculated at a lower frequency (for example every 10 ka). Cells are treated ~~one after the other~~  
 240 into layers around each clast. The border between two layers is set ~~at the middle between the clasts~~ (Figure 2). As a result, the number of layers and their size depend on the number and spacing of the clasts present in the regolith and can vary at each time step. Their number and depth depend either on the initial clasts seeded in the parent rock, or on the erosion-sedimentation processes affecting the regolith. The dissolution rate of the clasts is integrated within the corresponding layers, and their sum  
 245 provides an estimate of the dissolved flux per cell (Figure 2). The vertical meshing evolves through time, and adapts itself to the changing clast distribution according to the available clasts ~~on~~ each cell.

The dissolved chemical flux per layer  $w_l$  [L<sup>3</sup>T<sup>-1</sup>] is the clast dissolution rate per clast volume  $\frac{w_c}{v_c}$ ,  
 multiplied by the layer volume  $v_l$ . This value is also weighted by the ratio  $\frac{v_c}{v_o}$  between the current  
 250 and initial clast volumes in order to take the fact that the volume of weathering material decreases within the layer into account:

$$w_l = \frac{w_c}{v_c} v_l \frac{v_c}{v_o} \quad (14)$$



namely,

$$w_l = w_c \frac{v_l}{v_o} \quad (15)$$

255 The corresponding dissolved flux is also calculated for each mineral constituting the clasts, as well as for some of their elements according to their stoichiometric proportions in the minerals. If a clast is completely dissolved, it remains in the regolith or in the deposit where it is trapped so that there is an integration layer around it which produces zero chemical flux. This allows to account for the depleted layers of the soil. A totally dissolved clast is killed as soon as it is detached from the  
 260 regolith. The dissolved chemical flux of the entire cell  $w_{cell}$  is obtained by summing  $w_l$  (Figure 2). Finally, the total weathering outflux  $W$  [ $L^3T^{-1}$ ] integrated over the model grid is weighted by the relative proportion of regolith or sediment that contain clasts:

$$W = \frac{total\_regolith\_volume}{total\_regolith\_volume\_with\_clasts} \sum w_{cell} \quad (16)$$

#### 2.4 Clasts revival

265 A clast is killed when detached after complete dissolution, or if it simply goes out of the model grid. In both cases, the model offers the possibility to recycle the clast. It is put back into the same cell in which it was initially seeded, with the same characteristics, randomly, between depths 0 and  $B$  (regolith thickness) within the parent rock below the regolith (except if  $B = 0$  in which case the revival depth is set at 10 m to avoid the handling of numerous clasts where weathering is null). The  
 270 maximum depth  $B$  at which the clasts are repositioned is optimal in order to favour an equidistance between the clasts within the regolith. Recycling a dead clast to its initial location also permits to densify the number of clasts where the exhumation is faster. By this approach, a limited list of clasts is handled, while optimising their distribution at depth to obtain the best estimate of the chemical outflux. This is particularly efficient and useful when the landscape is uplifting and exhumes clasts.

#### 275 2.5 Non-dimensionalisation

Assuming  $m = 0.5$  and  $n = 1$  (Whipple and Tucker, 1999) and using the scaling factors  $H$  for mountain height,  $L$  for mountain width,  $P$  for effective precipitation rate (runoff) and  $U$  uplift rate, we obtain the non-dimensional form (\*) of the mass balance equation 1:

$$\frac{\partial z_*}{\partial t_*} = -N_{riv} q_*^{0.5} S_* + N_{depo} \frac{q_{sr*}}{q_*} - N_{hill} S_* \quad (17)$$

$$280 \quad + \frac{q_{sh*}}{\frac{dx_*}{1 - (S_*/S_{c*})^2}} - \frac{dq_{sl*}}{dx_*} + 1 \quad (18)$$

where



$$N_{riv} = KU^{-1}P^{0.5}L^{-0.5}H \text{ (River erosion)}$$

$$N_{depo} = \xi^{-1}P^{-1} \text{ (River sedimentation)}$$

$$N_{hill} = \kappa HU^{-1}L^{-1} \text{ (Hillslope erosion)}$$

285

These numbers affect the morphology of the resulting topography at steady state. Smaller  $N_{riv}$ ,  $N_{depo}$  and larger  $N_{hill}$  and  $S_c$  values yield topographies that are increasingly dominated by (diffusive) smooth and rounded hillslopes.

290 Following the same approach, the non-dimensional form of the regolith thickness variation (Supplementary Material) yields the number  $N_{reg} = \frac{w_{op}}{U}$ . This non-dimensional number determines whether or not regolith exists at dynamic equilibrium.  $N_{reg} > 1$  produces a regolith-covered mountain, whereas  $N_{reg} < 1$  leads to a bare-bedrock mountain (Carretier et al., 2014).

295 Finally, the dimensional analysis of the clast dissolution rate leads to a non-dimensional number  $N_{clast} = \frac{\tau_r}{\tau_m}$ , where  $\tau_r$  is a clast's residence time in the regolith at steady state ( $\tau_r = B/U$ ) and  $\tau_m$  is the characteristic dissolution time of the main mineral (here albite) defined as the time necessary to decrease the initial clast volume by a factor  $e^1$  (see the Supplementary Material for the full expression including the model parameters). This number includes the clast size and the kinetic parameters  
 300 associated with the particular mineral  $m$ .  $N_{clast}$  is actually the Damköhler number (e.g. White and Brantley, 2003; Hilley et al., 2010). This number indicates the weathering grade of a clast leaving the hillslopes. When  $N_{clast}$  is large, a clast leaving the regolith is very depleted, whereas it remains fresh if  $N_{clast}$  is small. The first situation has been called "supply" or "transport" or "erosion" limited weathering (e.g. Dixon et al., 2009a). The second situation has been called a "kinetically" limited  
 305 regime (e.g. Ferrier and Kirchner, 2008). Hilley et al. (2010) identified  $N_{reg}$  (" $\epsilon^*$ " for them) and  $N_{clast}$  (" $D_i$ " for them) as key parameters controlling the weathering flux at the scale of a soil column.

It is worth noting that experiments sharing different model parameters but the same non-dimensional  
 310 numbers give similar results (Supplementary Figure S1). Consequently, the complexity of this model is actually reduced to seven non-dimensional numbers reflecting a great diversity of natural climatic, weathering and erosion situations.

## 2.6 Model parameters that matter

The number of parameters that matter in this contribution can be reduced to three, namely the valley  
 315 widening parameter  $\alpha$ , the Damköhler number  $N_{clast}$  and the uplift-to-weathering number  $N_{reg}$ . The other four non-dimensional numbers  $S_c$ ,  $N_{riv}$ ,  $N_{depo}$  and  $N_{hill}$  affect the final relief, drainage density and hillslope roundness, and the response time for denudation to reach the uplift rate value.



The main result of this contribution does not depend significantly on these parameters. On the contrary,  $\alpha$ ,  $N_{clast}$  and  $N_{reg}$  determine the time spent by the clasts in the different weathering reservoirs (regolith, colluvium, valley). Thus, we primarily vary the parameters included in these numbers to study the different behaviours of the model with regards to the long-term trend of the weathering outflux.

### 3 Reference experiment WARM

We design a reference experiment, WARM, corresponding to a warm, wet and constant climate. An initial horizontal rough surface ( $\sigma = 0.5$  m) is uplifted. Sediment can leave the southern boundary but not the northern one (equivalent to a divide), and the two other sides are linked by periodic boundary conditions. The resulting half-mountain is 100 km wide and 150 km long ( $dx = 500$  m), similar to the length of the Himalayan or Andes catchments. Rivers do not erode laterally ( $\alpha = 0$ ), uplift rate  $U$  ( $1 \text{ mm a}^{-1}$ ) and the precipitation rate  $P$  ( $1 \text{ m a}^{-1}$ ) and temperature  $T$  at  $z = 0$  m ( $25^\circ\text{C}$ ) are kept constant. We fix the erodibility parameters ( $K$  and  $\kappa$ ) so that the maximum elevation at steady state reaches a reasonable height  $\sim 7000$  m consistent with the Andes and Himalaya, on a time scale of  $\sim 15$  Ma:  $K = 1.5 \cdot 10^{-4} \text{ a}^{-0.5}$  (bedrock) and  $2.5 \cdot 10^{-4} \text{ a}^{-0.5}$  (regolith or sediment) are within the range of previous estimates (Giachetta et al., 2015),  $\kappa = 10^{-4} \text{ m a}^{-1}$  and  $S_c = 0.84$  ( $= \tan 40$ ) for both bedrock and loose material, and  $\xi = 0.1 \text{ a m}^{-1}$  (Table 1).

In the regolith production law (Equation 8),  $E_a = 48 \text{ kJ mol}^{-1}$  is intermediate between albite and biotite, the minerals which control the weathering front advance. The reference temperature  $T_o = 298.15 \text{ K}$ . The humped attenuation parameters are from Strudley et al. (2006), with  $d_1 = 0.5$  m,  $d_2 = 0.1$  m and  $k_1 = 0.8$ . We acknowledge that these parameters are empirical and are not necessarily representative of chemical weathering. We come back to this point later. With these values, the regolith production rate  $w$  is optimal ( $w_{op}$ ) for  $B = 0.17$  m. The parameter  $k_w = 0.003 \text{ m a}^{-1}$  is chosen so that  $N_{reg} = 1.7$ , a value  $> 1$  implies that the hillslopes are mantled by a 0.55 m thick regolith at dynamic equilibrium.

The reference model uses 10000 clasts spread randomly in the bedrock between 0 and 4 m below the initial surface (Figure 2c). Each clast mixes albite (55%), quartz (30%) and biotite (15%) with a 1 mm radius and a roughness factor  $\lambda = 1$ . The dissolution parameters of these minerals are from experimental studies (Brantley et al., 2008):  $E_a = 66000 \text{ J mol}^{-1}$  (albite), 85000 (quartz) and 35000 (biotite).  $k_m = 10^{-12.26} \text{ mol m}^{-2} \text{ s}^{-1}$  (albite),  $10^{-13.39}$  (quartz) and  $10^{-10.88}$  (biotite).  $V_m = 1.002 \cdot 10^{-4} \text{ m}^3 \text{ mol}^{-1}$  (albite),  $2.269 \cdot 10^{-4}$  (quartz) and  $1.5487 \cdot 10^{-4}$  (biotite). With these parameters,  $N_{clast} = 0.003$ , a value that indicates that the weathering is mainly kinetically limited when the denudation rate equals the uplift rate at dynamic equilibrium.



## 4 Results

### 4.1 Regolith-covered mountains

355 We run the simulation WARM until erosion balances uplift, which occurs when the maximum elevation is  $\sim 7000$  m after  $\sim 15$  Ma of simulation. Figure 3 shows that during the adaptation of the topography and erosion to the imposed uplift, the mean regolith production rate increases. As predicted by the value of  $N_{reg} > 1$  ( $= 1.7$ ), the mountain is covered by a  $\sim 0.5$  m thick regolith at dynamic equilibrium. The mean regolith thickness reaches a maximum in the early times of the surface uplift when erosion is still low in average. Then the regolith thickness decreases as the drainage network invades the uplifting surface and as the hillslopes steepen. The weathering flux increases during this process because increasing erosion removes depleted clasts from the regolith, fosters the descent of the weathering front, and thus supplies fresh clasts to the regolith: the weathering is supply limited in average. Then, near 6 Ma, the erosion becomes too large and the regolith too thin for clasts to have time to significantly weather in the regolith. The weathering flux reaches a steady state and the weathering becomes kinetically limited, which is consistent with the small Damköhler number ( $N_{clast} = 0.003$ ) of this experiment.

The weathering rate is also plotted against the total denudation rate and compared to data in Figure 4, as well as the parametrical model of West (2012). Other experiments are plotted, in which we vary the uplift ( $U / 10$  to  $\times 5$ ), temperature ( $T / 1.4$ ), precipitation ( $P / 5$ ), clast size ( $r = 0.25$ -5 mm) and mineral roughness ( $\lambda \times 160$ ) and mineralogy (granitoid or pure albite). For experiments with larger  $N_{clast}$  values than the reference experiment (mainly supply limited), the denudation and weathering rates fit the linear relationship observed for regolith-covered landscapes characterized by supply-limited weathering (e.g. Dixon et al., 2009a). For experiments with a smaller  $N_{clast}$  value, the weathering becomes progressively kinetically limited as in the reference experiment, and thus saturates at high denudation rates (Figure 4). Overall, Figure 4 shows that the range of weathering and denudation rates predicted by these different simulations through time fits a large range of data for regolith-covered mountains.

### 4.2 Cooling and bedrock mountains

In the following, we explore the response of weathering in the case of a cooling and drying climate. In a first set of experiments (COOLING and OROGRAPHIC), the mountains become entirely bedrock at the end of the cooling period. These experiments represent an end-member model as pure bare bedrock mountains probably do not exist (Heimsath et al., 2012). Nevertheless, this case is useful to quantify the effect of colluvium temporally stored on valley borders. In a second time, we explore more realistic experiments for which the mountain is partially covered by a regolith at



the end of the cooling process (COOLING REG. and OROGRAPHIC REG.).

The modelled cooling operates through a decrease in temperature at the mountain foot in four  
 390 arbitrary steps of  $-2^{\circ}\text{C}$  at 3, 6, 9 and 12 Ma of the model time. Furthermore, a temperature gradi-  
 ent of  $-6^{\circ}\text{C km}^{-1}$  is prescribed. Moreover, in order to account for the drying potentially associated  
 with global cooling, we add a rainfall decrease of  $-5\%$  per degree of cooling (Labat et al., 2004;  
 Maher and Chamberlain, 2014). Figure 5 shows the response to this climate change for the COOL-  
 ING experiment, which uses the same parameters as the previous WARM reference experiment.  
 395 During the mountain rise, progressive cooling and drying decreases the regolith production rate and  
 the clast weathering rate. Moreover, the erosion rate increases. During the first several millions of  
 years, the weathering flux increases because there is a sufficient landscape area covered by regolith  
 characterised by supply-limited weathering. Then, the regolith cover decreases dramatically and the  
 weathering flux falls to zero everywhere in the bedrock mountain (Figure 5).

400

We now allow valleys to widen by lateral erosion for the same experiment. The factor  $\alpha$  control-  
 ling the widening rate of the valleys is poorly constrained. Nicholas (2013) used a slightly different  
 equation for lateral erosion  $q_{sl} = (E S_l) q_{sr}$ , where  $S_l$  is the lateral slope. He calibrated  $E$  between  
 1 and 10 in large alluvial rivers. With lateral slopes  $S_l$  on the order of 0.01,  $\alpha$  ranges between 0.01  
 405 and 0.1 for sediment. We use a lower reference value  $\alpha = 0.001$  for regolith or sediment, probably  
 better adapted to large pixels. Allowing rivers to erode laterally, the weathering rate follows the same  
 initial evolution but then, it does not fall to zero (Figure 5). Valley widening steepens the foot of the  
 hillslopes on the borders of the valleys, which generates mass wasting and the deposition of fresh  
 material on the valley borders (Figure 5c). This fresh minerals weather before being removed by  
 410 rivers. Colluvium reside long enough in valleys (99% of the clast residence times are smaller than  
 1500 years in the COOLING experiment with lateral erosion - Figure 6) to generate a significant and  
 nearly constant weathering rate. As there is no remaining regolith on the hillslopes even at low eleva-  
 tions (erosion exceeds the regolith production rate), colluvium are the only loose material producing  
 a weathering flux. The prescribed drops in rainfall have a limited impact on the weathering flux of  
 415 the colluvium (Figure 5). Indeed, a decrease in water discharge increases the colluvium residence  
 time (Figure 6), which counterbalances their lower weathering rate. Consequently the weathering  
 flux reaches a steady-state when an equilibrium is reached between the rate of colluvium removal  
 and their weathering rate. Dividing the lateral erosion parameter  $\alpha$  by two and five only decreases  
 the weathering flux by a quarter and a half, respectively (Figure 5a). As soon as  $\alpha$  is large enough  
 420 for the valleys to widen and to drive mass wasting, the volume of the colluvial deposits depends  
 weakly on  $\alpha$ . The lower weathering rate for narrower valleys is due to the smaller residence times of  
 colluvial deposits in the mountain.

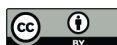

Figure 7 illustrates the effect of colluvium weathering for several experiments using different  
 425 model parameters. In all cases but one, colluvium associated with valley widening sustain the weath-  
 ering rate for large denudation rates. The exception corresponds to a slowly uplifting domain with  
 arid climate where weathering clasts are coarse ( $U/10$ ,  $P/5$ , and  $r \times 5$  compared to the COOLING  
 experiment). In this case, the removal of the regolith is slow. After 20 Ma, a large portion of the  
 domain is still covered by regolith which remains the main weathering reservoir.

430 Prescribing a orographic-like distribution of rainfall with a rainfall peak centred at 1300 m or 2000  
 m a.s.l. like in the Andes or Himalaya (Bookhagen and Strecker, 2008; Bookhagen and Burbank,  
 2006) has a limited effect compared to previous cooling experiments (Figure 8). Colluvium mainly  
 form along valley floors at elevations where the rainfall is higher, which promotes their weathering  
 435 but decreases their residence time. The weathering steady-state occurs earlier with the orographic  
 peak at 2000 m because the regolith is removed faster and thus colluvium dominate earlier in the  
 weathering evolution.

### 4.3 Cooling and mountains partially covered by regolith

Previous cooling models led to bare bedrock mountains. Nevertheless, soils almost always cover  
 440 the bedrock at low elevations. In order to generate a more realistic regolith distribution, we only  
 increase the bedrock weatherability by increasing the parameter  $k_w$  in the regolith production law  
 (Equation 8). In the resulting COOLING REG. experiments, a regolith persists at low elevations  
 ( $< 1500$  m) when the climate is cooler and drier. In this case, the persistent regolith is able to  
 sustain the weathering rate of the whole mountain at a significant value (Figure 9). Adding valley  
 445 widening ( $\alpha = 0.001$ ) does not significantly modify the weathering flux evolution during the last 10  
 Ma. Nevertheless, colluvium still play a role in that case. Because the hillslopes steepen near valley  
 borders, the area covered by regolith is reduced by half compared to the case without lateral erosion.  
 Yet, the weathering flux is similar with and without lateral erosion, which shows that colluvium  
 account for half the weathering flux. This fraction is also observed for the OROGRAPHIC REG.  
 450 experiments that use a Gaussian rainfall-elevation relationship (Figure 10).

### 4.4 Other regolith production laws and pixel size

We made assumptions about the regolith production law. Yet, the form of the production law controls  
 the spatial distribution of the regolith thickness and production rate in a mountain (Carretier et al.,  
 2014; Braun et al., 2016). We thus test the robustness of our main result by assuming an exponential  
 455 regolith production rather than a humped law. We do this by setting  $k_1 = 0$  in Equation 7. In order  
 to compare experiments, we also decrease  $k_w$  (Equation 8) so that the maximum regolith produc-  
 tion rate for bare bedrock equals the optimum regolith production rate calculated using the humped  
 version of the law (same  $N_{reg}$  at  $z = 0$  m - Table 1). Figure 11 compares the OROGRAPHIC ex-



periments using the humped law with the same experiments using the exponential law. For regolith  
 460 thickness larger than the optimum thickness, the regolith production is faster for the humped law.  
 Consequently, the total volume of regolith produced with this law is larger. The weathering flux is  
 thus greater with the humped law while some regolith remains.

We now assume that the regolith thickness decreases as  $1/B$  for thicknesses larger than the opti-  
 465 mum thickness (0.17 m), instead of exponentially (Braun et al., 2016). This different law produces a  
 much thicker regolith of several tens of meters in the early stage ( $\sim 1$  Ma) of the mountain erosion.  
 This rapid regolith thickening generates a weathering peak, but which is only twice that produced  
 with the humped law (Figure 11). Indeed, the thick regolith is rapidly depleted, so that only the  
 weathering of its deeper layer feeds the weathering outflux after several hundreds of thousand years.  
 470 Then, the weathering flux follows the same evolution as with the humped law.

Finally, in order to test the influence of mountain size and model resolution, we reduce the pixel  
 size to 20 m (Figure 12). The widening parameter  $\alpha$  is multiplied by 5 in order to have a valley width  
 larger than one pixel. The same transfer from the weathering reservoir on the hillslopes to the valley  
 475 borders is observed. This suggests that this main outcome does not depend on the system size.

## 5 Discussion

Cidre does not model the precipitation of secondary minerals, or variations in the pH,  $p\text{CO}_2$  and  
 changes in the chemical equilibrium related to the water-rock interaction (Oelkers et al., 1994;  
 Brantley et al., 2008; Lebedeva et al., 2010), so that the predicted fluxes may be overestimated.  
 480 Furthermore, the groundwater circulation is also neglected, although it can contribute significantly  
 to the weathering outflux (Calmels et al., 2011; Maher, 2011).

Nevertheless, our modelling approach presents several advantages: the model is at the scale of the  
 whole landscape but also at the pedon scale (a denser clast distribution can be set in specific areas  
 485 of interest); any mineralogical assemblage and clast size distribution can be studied; there is no need  
 to calculate the mountain weathering outflux  $W$  at each time step. If only a long-term trend of  $W$   
 is studied, it can be calculated at a low frequency, which is computationally efficient and allows this  
 3D approach to be applied to long time periods. Most importantly, 1- weathered material can be fol-  
 lowed from the source to the sink and 2- the weathering outflux results from the stochastic residence  
 490 times of the clasts in the hillslopes and in rivers. These two last points constitute the main differ-  
 ences of our approach compared to previous pedon and landscape weathering models (e.g. Ferrier  
 and Kirchner, 2008; Vanwallegem et al., 2013; Braun et al., 2016).



All previous models founded on clast residence time in the regolith predict that weathering should  
 495 be zero when the regolith disappears (e.g. Ferrier and Kirchner, 2008). Yet, documented catchment  
 weathering rates are significantly larger than zero (Dixon and von Blanckenburg, 2012). A simple  
 explanation may be that there is always a sufficient fraction of hillslopes covered by soils to pro-  
 duce a significant weathering flux, even in fast-eroding mountains (Larsen et al., 2014; Heimsath  
 et al., 2012). Alternatively, deep weathering within fractured bedrock may account for this differ-  
 500 ence. Calmels et al. (2011) showed that this deep weathering reservoir accounts for more than 1/3 of  
 the silicate weathering flux of a catchment in Taiwan. The significant contribution of deep groundwa-  
 ter weathering echoes the model proposed by Maher (2010). In this model, this is the ratio between  
 the fluid residence time and the characteristic mineral dissolution time (our  $\tau_m$ ) which controls the  
 weathering flux, rather than the ratio  $N_{clast}$  between the clast's residence time and  $\tau_m$ . West (2012)  
 505 argued also for a monotonic increase of chemical weathering with erosion due to water circulation in  
 the fractured bedrock, so that the weathering would not critically depend on the regolith thickness.  
 If alternatively the weathering layer corresponds to the vadose zone, then this layer may thicken  
 and sustain the weathering flux in rapidly eroding hillslopes (Rempe and Dietrich, 2014; Maher and  
 Chamberlain, 2014; Braun et al., 2016).

510

Our model points to another possible reservoir: the colluvium temporarily stored along valley bor-  
 ders. When the regolith thins, colluvium become the main locus of weathering, which prevents the  
 weathering outflux of the catchment from dropping to very low values. This finding is supported by  
 the correlation between the weathering rate and the volume of the landslides present in catchments  
 515 in southwestern New Zealand (Emberson et al., 2016a). In another catchment in New Zealand, Em-  
 berson et al. (2016b) monitored a recent landslide and demonstrated that landslides can generate  
 extremely high and local weathering flux. In this case, the weathering flux results mainly from the  
 oxidation of pyrite and the dissolution of carbonate. Although these phases and the pH effect were  
 not included in our simulations, the underlying process by which landslides sustain the catchment  
 520 weathering is the same as in our simulations. Landslides and colluvium both rapidly exhume fresh  
 minerals which reside long enough in the catchment to boost its weathering outflux. As stated by Em-  
 berson et al. (2016b), the cumulative contribution of landslides to the catchment weathering should  
 depend on the landslide storage duration and the characteristic dissolution time of the most labile  
 phases. In our simulations, the most labile phases are albite and biotite with a characteristic dissolu-  
 525 tion time of several thousand years. The clast residence time distribution provides a direct estimate  
 of the colluvium residence times of several thousand years (Figure 6). These durations are consistent  
 with residence times in the Andes for example, as determined from U series (Dosseto et al., 2008).  
 Thus, grains stay in the catchments long enough to yield a significant weathering flux. Neverthe-  
 less, our model does not account for the full stochasticity of landslides documented by Emberson  
 530 et al. (2016a). In our model, colluvium are produced relatively continuously, so that differences in

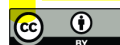

clast residence times are mainly due to progressive colluvium removal and differences in the initial distance from the outlet. In real landscapes, even those without significant lateral river erosion, there will still be colluvium storage on the hillslopes because the sediment production is stochastic. Thus, a better description should include the stochastic production of landslides (Gabet, 2007).

535 Despite these limitations, our results extend the findings of Emberson et al. (2016a) and Emberson et al. (2016b) by showing that the weathering of such collapsed material covering a very limited catchment area may control the weathering evolution of mountains over millions of years, even if their residence time in the catchment is not longer than several centuries or millennia. The impact of colluvium does not contradict weathering models based on the fluid residence time. The porosity  
540 increase in colluvium should increase the groundwater velocity in colluvium and thus the weathering flux (Maher, 2011; Emberson et al., 2016b).

Despite its limitations, our model predicts weathering-erosion rates within the range of existing data (Figures 3, 8) and may explain this range in terms of topographic evolution. In cooling experiments, our model predicts weathering rates that initially increase with time due to supply-limited  
545 conditions and increasing erosion, but then decline because the regolith is progressively stripped off. This hump evolution is consistent with previous 1D models (Gabet and Mudd, 2009; Dixon and von Blanckenburg, 2012). This is a remarkable similarity given the heterogeneity of the regolith thickness and denudation rate in the simulated landscapes during the relief growth. In our modellings,  
550 the hump in the weathering evolution results from the progressive stripping of the regolith via an increasing erosion rate and cooling climate, whatever the form of the regolith production law. The peak occurs ~~for some optimum compromise between the~~ area covered by regolith and its thickness distribution (Carretier et al., 2014). When accounting for colluvium, the weathering peak is followed by a nearly constant weathering flux in agreement with models assuming a constant weathering layer  
555 (West, 2012) or based on the residence time of the groundwater (Maher and Chamberlain, 2014). However in our model, this sustained weathering rate does not result from a constant weathering layer but rather from a change in the weathering reservoir.

The contribution of colluvium to the weathering flux should depend on the ratio between river  
560 width and valley width, which itself depends on the lithology, uplift rate or flood distribution (e.g. Brocard and der Beek, 2006). Thus, the colluvium reservoir cannot be considered as a general model for all catchments. Nevertheless, colluvium contribute significantly in all our cooling simulations, regardless of the rainfall pattern or catchment size. This suggests that fresh sediment that is temporarily stored along valleys, irrespective of the cause of their width (uplift variations, glaciations, etc.), may  
565 contribute to the long-term weathering fluxes trend. In particular, the weathering of these sediment may be only slightly dependent on climate variations. An increase in water discharge fosters mineral weathering but at the same time decreases mineral residence times, so that the net weathering varia-



tion is negligible (Figure 6). The same balance may operate in foreland basins and may take part in the weathering stability over the last 12 Ma observed in the offshore sediment record (Willenbring  
570 and von Blanckenburg, 2010; von Blanckenburg et al., 2015).

In cooling experiments (Figure 7), the short weathering time of the grains implies that they are only partially weathered when they leave the mountain, so that their weathering in adjacent basins could also contribute to the total weathering outflux. Few data confirm this behaviour (Lupker et al.,  
575 2012; Bouchez et al., 2012; Moquet et al., 2016). The contribution of the basin still needs to be analysed through the stochastic dynamics of the grains in the alluvial plain, a study within the scope of our model.

## 6 Conclusion

We designed a new model at the landscape scale which takes the weathering of distinct clasts in the regolith, colluvium and rivers into account. This model accounts for part of the stochasticity  
580 of sediment transport, which is reflected by the distribution of the clast residence times in an uplifting mountain. The weathering model has limitations (no groundwater model, no dependence on PH or pCO<sub>2</sub> or water-rock chemical disequilibrium, no precipitation of secondary phases). Nevertheless the model predicts a range of weathering rates consistent with the available data for a wide  
585 range of climatic and tectonic contexts. During the rising of a mountain and as the climate cools, the weathering flux increases and then decreases, which is consistent with previous models. In addition, the dynamic adjustment of the topography, the tracing of weathered material and the stochastic transport of grains point to a possible significant contribution from colluvial deposits during cold periods. This weathering reservoir may contribute to a high and constant weathering flux in rapidly  
590 eroding mountains under cold conditions, in addition to deep weathering in fractured bedrock and other potential reservoirs. This new model opens perspectives to study the weathering contribution of foreland basins during mountain growth and decline and the response of these reservoirs to cyclic climatic variations.

595 **Acknowledgment.** This paper is a contribution to the LMI COPEDIM (funding from IRD). M.R. acknowledges funding by the MSI grant "Millennium Nucleus for Metal Tracing Along Subduction (NC130065)". Constructive comments from two reviewers in a previous version were appreciated. Sara Mullin edited the english.

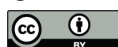

## 600 References

- Anderson, S., Anderson, R., and Tucker, G.: Landscape scale linkages in critical zone evolution, *Comptes Rendus GeoScience*, 344, 586–596, 2012.
- Bookhagen, B. and Burbank, D.: Topography, relief, and TRMM-derived rainfall variations along the Himalaya, *Geophys. Res. Lett.*, 33, doi:10.1029/2006GL026037, 2006.
- 605 Bookhagen, B. and Strecker, M. R.: Orographic barriers, high-resolution TRMM rainfall, and relief variations along the eastern Andes, *Geophys. Res. Lett.*, 35, L06 403, doi:10.1029/2007GL032011, 2008.
- Bouchez, J., Gaillardet, J., Lupker, M., Louvat, P., France-Lanord, C., Maurice, L., Armijos, E., and Moquet, J.-S.: Floodplains of large rivers: Weathering reactors or simple silos?, *Chemical Geology*, 332, 166–184, doi:10.1016/j.chemgeo.2012.09.032, 2012.
- 610 Brantley, S., Bandstra, J., Moore, J., and White, A.: Modelling chemical depletion profiles in regolith, *Geoderma*, 145, 494–504, 2008.
- Braun, J., Mercier, J., Guillocheau, F., and Robin, C.: A simple model for regolith formation by chemical weathering, *J. Geophys. Res. Earth Surface*, 121, 2140–2171, doi:10.1002/2016JF003914, 2016.
- Brocard, G. and der Beek, P. V.: Influence of incision rate, rock strength and bedload supply on bedrock  
 615 river gradients and valley-flat widths: Field-based evidence and calibrations from western Alpine rivers (SE France), in: *Tectonics, Climate and Landscape Evolution*, edited by S.D. Willett and N. Hovius and M.T. Brandon and D. Fisher, *Geol. Soc. Am. Spec. Publ.*, 2006.
- Calmels, D., Galy, A., Hovius, N., Bickle, M., West, A. J., Chen, M.-C., and Chapman, H.: Contribution of deep groundwater to the weathering budget in a rapidly eroding mountain belt, Taiwan, *Earth Planet. Sci. Lett.*,  
 620 303, 48–58, doi:10.1016/j.epsl.2010.12.032, 2011.
- Carretier, S., Godderis, Y., Delannoy, T., and Rouby, D.: Mean bedrock-to-saprolite conversion and erosion rates during mountain growth and decline, *Geomorphology*, 209, 29–52, doi:10.1016/j.geomorph.2013.11.025, 2014.
- Carretier, S., Martinod, P., Reich, M., and Godderis, Y.: Modelling sediment clasts transport during landscape  
 625 evolution, *Earth Surf. Dynam.*, 4, 237–251, doi:10.5194/esurf-4-237-2016, 2016.
- Cohen, S., Willgoose, G., and Hancock, G.: Soil-landscape response to mid and late Quaternary climate fluctuations based on numerical simulations, *Quaternary Res.*, 79, 452–457, doi:10.1016/j.yqres.2013.01.001, 2013.
- Davy, P. and Lague, D.: The erosion / transport equation of landscape evolution models revisited, *J. Geophys. Res.*, 114, doi:10.1029/2008JF001146, 2009.
- 630 Dixon, J. and von Blanckenburg, F.: Soils as pacemakers and limiters of global silicate weathering, *Comptes Rendus Geosc.*, 344, 597–609, doi:10.1016/j.crte.2012.10.012, 2012.
- Dixon, J., Heimsath, A., and Amundson, R.: The critical role of climate and saprolite weathering in landscape evolution, *Earth Surf. Proc. Land.*, 34, 1507–1521, doi:10.1002/esp.1836, 2009a.
- 635 Dixon, J., Heimsath, A., Kaste, J., and Amundson, R.: Climate-driven processes of hillslope weathering, *Geology*, 37, 975–978, doi:10.1130/G30045A.1, 2009b.
- Dosseto, A., Bourdon, B., Gaillardet, J., Maurice-Bourgoin, L., and Allègre, C.: Weathering and transport of sediments in the Bolivian Andes: Time constraints from uranium-series isotopes, *Earth Planet. Sci. Lett.*, 248, 759–771, 2006.

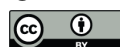

- 640 Dosseto, A., Turner, S., and Chappell, J.: The evolution of weathering profiles through time: new insights from uranium-series isotopes., *Earth Planet. Sci. Lett.*, 274, 359–371, 2008.
- Dupré, B., Dessert, C., Oliva, P., Goddérès, Y., Viers, J., François, L., Millot, R., and Gaillardet, J.: Rivers, chemical weathering and Earth's climate, *Compt. R. Acad. Sci.*, 335, 1141–1160, 2003.
- Embersson, R., Hovius, N., Galy, A., and Marc, O.: Chemical weathering in active mountain belts controlled by stochastic bedrock landsliding, *Nature GeoSciences*, 9, 42, doi:10.1038/NGEO2600, 2016a.
- 645 Embersson, R., Hovius, N., Galy, A., and Marc, O.: Oxidation of sulfides and rapid weathering in recent landslides, *Earth Surface Dynamics*, 4, 727–742, doi:10.5194/esurf-4-727-2016, 2016b.
- Ferrier, K. and Kirchner, J.: Effects of physical erosion on chemical denudation rates: A numerical modeling study of soil-mantled hillslopes, *Earth Planet. Sci. Lett.*, 272, 591–599, 2008.
- 650 Fletcher, R., Buss, H., and Brantley, S.: A spheroidal weathering model coupling porewater chemistry to soil thicknesses during steady-state denudation, *Earth Planet. Sci. Lett.*, 244, 444–457, doi:10.1016/j.epsl.2006.01.055, 2006.
- Gabet, E. and Mudd, S.: A theoretical model coupling chemical weathering rates with denudation rates, *Geology*, 37, 151–154, 2009.
- 655 Gabet, E. J.: A theoretical model coupling chemical weathering and physical erosion in landslide-dominated landscapes, *Earth Planet. Sci. Lett.*, 264, 259–265, doi:10.1016/j.epsl.2007.09.028, 2007.
- Gaillardet, J., Dupré, B., Louvat, P., and Allègre, C.: Global silicate weathering and CO<sub>2</sub> consumption rates deduced from the chemistry of the large rivers, *Chem. Geol.*, 159, 3–30, 1999.
- Galy, V., Peucker-Ehrenbrink, B., and Eglinton, T.: Global carbon export from the terrestrial biosphere controlled by erosion, *Nature*, 521, 204, doi:10.1038/nature14400, 2015.
- 660 Giachetta, E., Molin, P., Scotti, V. N., and Faccenna, C.: Plio-Quaternary uplift of the Iberian Chain (central-eastern Spain) from landscape evolution experiments and river profile modeling, *Geomorphology*, 246, 48–67, doi:10.1016/j.geomorph.2015.06.005, 2015.
- Gilbert, G.: Report on the Geology of the Henry Mountains U.S. Geographical and Geological Survey of the Rocky Mountain Region Washington D.C, Tech. rep., 1877.
- 665 Heimsath, A. M., Dietrich, W. E., Nishiizumi, K., and Finkel, R. C.: The soil production function and landscape equilibrium, *Nature*, 388, 358–361, 1997.
- Heimsath, A. M., DiBiase, R., and Whipple, K.: Soil production limits and the transition to bedrock-dominated landscapes, *Nature GeoSciences*, pp. 1–4, doi:DOI: 10.1038/NGEO1380, 2012.
- 670 Hilley, G., Chamberlain, C., Moon, S., Porder, S., and Willett, S.: Competition between erosion and reaction kinetics in controlling silicate-weathering rates, *Earth Planet. Sci. Lett.*, 293, 191–199, 2010.
- Labat, D., Godderis, Y., Probst, J., and Guyot, J.: Evidence for global runoff increase related to climate warming, *Advances in Water Resources*, 27, 631–642, 2004.
- Larsen, I., Almond, P., Eger, A., Stone, J., Montgomery, D., and Malcolm, B.: Rapid Soil Production and Weathering in the Southern Alps, New Zealand, *Science*, 343, 637–640, doi:10.1126/Science.1244908, 2014.
- 675 Lebedeva, M., Fletcher, R., and Brantley, S.: A mathematical model for steady-state regolith production at constant erosion rate, *Earth Surf. Proc. Land.*, 35, 508–524, doi:10.1002/esp.1954, 2010.



- Lupker, M., France-Lanord, C., Galy, V., Lave, J., Gaillardet, J., Gajurel, A., Guilmette, C., Rahman, M., Singh, S., and Sinha, R.: Predominant floodplain over mountain weathering of Himalayan sediments (Ganga basin), *Geochemical et Cosmochemica Acta*, 84, 410–432, doi:10.1016/j.gca.2012.02.001, 2012.
- 680 Maher, K.: The dependence of chemical weathering rates on fluid residence time, *Earth Planet. Sci. Lett.*, 294, 101–110, doi:10.1016/j.epsl.2010.03.010, 2010.
- Maher, K.: The role of fluid residence time and topographic scales in determining chemical fluxes from landscapes, *Earth Planet. Sci. Lett.*, 312, 48–58, 2011.
- 685 Maher, K. and Chamberlain, C. P.: Hydrologic Regulation of Chemical Weathering and the Geologic Carbon Cycle, *Science*, 343, 1502–1504, doi:10.1126/Science.1250770, 2014.
- Millot, R., Gaillardet, J., Dupre, B., and Allègre, C.: The global control of silicate weathering rates and the coupling with physical erosion: new insights from rivers of the Canadian Shield, *EPSL*, 196, 83–98, 2002.
- Moquet, J.-S., Guyot, J.-L., Crave, A., Viers, J., Filizola, N., Martinez, J.-M., Oliveira, T. C., Hidalgo Sanchez, L. S., Lagane, C., Lavado Casimiro, W. S., Noriega, L., and Pombosa, R.: Amazon River dissolved load: temporal dynamics and annual budget from the Andes to the ocean, *Environmental Science and Pollution Research*, 23, 11 405–11 429, doi:10.1007/s11356-015-5503-6, 2016.
- 690 Mouchene, M., van der Beek, P., Carretier, S., and Mouthereau, F.: Autogenic versus allogenic controls on the evolution of a coupled fluvial megafan-mountainous catchment system: numerical modelling and comparison with the Lannemezan megafan system (northern Pyrenees, France), *Earth Surface Dynamics*, 5, 125–143, doi:10.5194/esurf-5-125-2017, 2017.
- Mudd, S. and Yoo, K.: Reservoir theory for studying the geochemical evolution of soils, *J. Geophys. Res.*, 115, F03 030, doi:10.1029/2009JF001591, 2010.
- Murray, A. B. and Paola, C.: Properties of a cellular braided-stream model, *Earth Surf. Proc. Land.*, 22, 1001–1025, 1997.
- 700 Nicholas, A.: Morphodynamic diversity of the world's largest rivers, *Geology*, 41(4), 475–478, doi:10.1130/G34016.1, 2013.
- Nicholas, A. and Quine, T.: Modeling alluvial landform change in the absence of external environmental forcing, *Geology*, 35, 527–530, doi:10.1130/G23377A.1, 2007.
- 705 Norton, K. P., Molnar, P., and Schlunegger, F.: The role of climate-driven chemical weathering on soil production, *Geomorphology*, 204, 510–517, doi:10.1016/j.geomorph.2013.08.030, 2014.
- Oelkers, E., Schott, J., and Devidal, J.: The effect of aluminium, PH, and chemical affinity on the rates of aluminosilicate dissolution reactions, *Geochimica Et Cosmochimica Acta*, 58, 2011–2024, doi:10.1016/0016-7037(94)90281-X, 1994.
- 710 Oelkers, E. H., Gislason, S. R., Eiriksdottir, E. S., Jones, M., Pearce, C. R., and Jeandel, C.: The role of riverine particulate material on the global cycles of the elements, *Applied Geochemistry*, 26, S365–S369, doi:10.1016/j.apgeochem.2011.03.062, 2011.
- Oliva, P., Viers, J., and Dupré, B.: Chemical weathering in granitic environments, *Chemical Geology*, 202, 225–256, 2003.
- 715 Raymo, M., Ruddiman, W., and Froelich, P.: Influence of late Cenozoic mountain building on ocean geochemical cycles, *Geology*, 14, 649–653, 1988.



- Rempe, D. and Dietrich, B.: A bottom-up control on fresh-bedrock topography under landscapes, *PNAS*, 111(18), 6576–6581, doi:10.1073/pnas.1404763111, 2014.
- Riebe, C., Kirchner, J., and Finkel, R.: Erosional and climatic effects on long-term chemical weathering rates in granitic landscapes spanning diverse climate regimes, *Earth Planet. Sci. Lett.*, 224, 547–562, 2004.
- 720 Schoonejans, J., Vanacker, V., Opfergelt, S., Ameijeiras-Marino, Y., and Christl, M.: Kinetically limited weathering at low denudation rates in semiarid climatic conditions, *J. Geophys. Res. Earth Surface*, 121, 336–350, doi:10.1002/2015JF003626, 2016.
- Strudley, M., Murray, A., and Haff, P.: Emergence of pediments, tors, and piedmont junctions from a bedrock weathering-regolith thickness feedback, *Geology*, 34, 805–808, doi:10.1130/G22482.1, 2006.
- 725 Vanwalleghe, T., Stockmann, U., Minasny, B., and McBratney, A.: A quantitative model for integrating landscape evolution and soil formation, *J. Geophys. Res. Earth Surf.*, 118, 331–347, doi:10.1029/2011JF002296, 2013.
- von Blanckenburg, F., Bouchez, J., Ibarra, D., and Maher, K.: Stable runoff and weathering fluxes into the oceans over Quaternary climate cycles, *Nature GeoSciences*, 8, 538–U146, doi:10.1038/NGEO2452, 2015.
- 730 Walker, J., Hays, P., and Kasting, J.: A negative feedback mechanism for the long-term stabilization of Earth's surface temperature, *J. Geophys. Res.*, 86, 9776–9782, 1981.
- West, A.: Thickness of the chemical weathering zone and implications for erosional and climatic drivers of weathering and for carbon-cycle feedbacks, *Geology*, 40, 811–814, 2012.
- 735 West, A., Galy, A., and Bickle, M.: Tectonic and climatic controls on silicate weathering, *Earth Planet. Sci. Lett.*, 235, 211–228, 2005.
- Whipple, K. X. and Tucker, G. E.: Dynamics of the stream-power incision model: implication for height limits of mountain ranges, landscape response timescales, and research needs, *J. Geophys. Res.*, 104, 17,661–17,674, 1999.
- 740 White, A. and Blum, A.: Effects of climate on chemical weathering rates in watersheds, *Geochim. Cosmochim. Acta*, 59, 1729–1747, 1995.
- White, A. and Brantley, S.: The effect of time on the weathering of silicate minerals: why do weathering rates differ in the laboratory and field?, *Chemical Geology*, 202, 479–506, doi:10.1016/j.chemgeo.2003.03.001, 11th Annual V M Goldschmidt Conference, Hot Springs, Virginia, May 20–24, 2001, 2003.
- 745 White, A., Schulz, M., Vivit, D., Blum, A., Stonestrom, D., and Anderson, S.: Chemical weathering of a marine terrace chronosequence, Santa Cruz, California I: Interpreting rates and controls based on soil concentration-depth profiles, *Geochim. Cosmochim. Acta*, 72, 36–68, 2008.
- Wilkinson, M., Chappell, J., Humphreys, G., Fifield, K., Smith, B., and Hesse, P.: Soil production in heath and forest, Blue Mountains, Australia: influence of lithology and palaeoclimate, *Earth Surf. Proc. Land.*, 30, 923–934, 2005.
- 750 Willenbring, J. and von Blanckenburg, F.: Long-term stability of global erosion rates and weathering during late-Cenozoic cooling, *Nature*, 465, 211–214, doi:10.1038/nature09044, 2010.

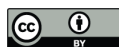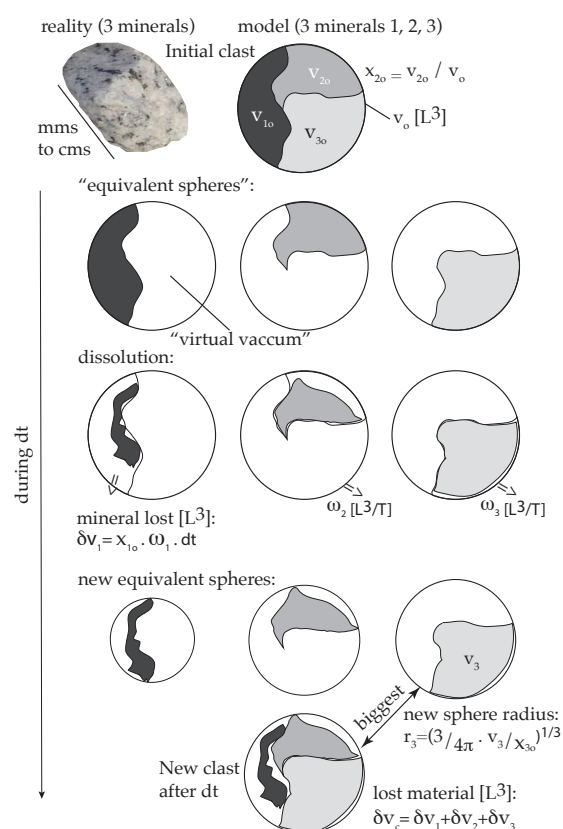

**Figure 1.** The dissolution model for a clast made up of three different mineral types. The sequence from top to bottom illustrates the mineral dissolution and the resulting clast size decrease during a time step.

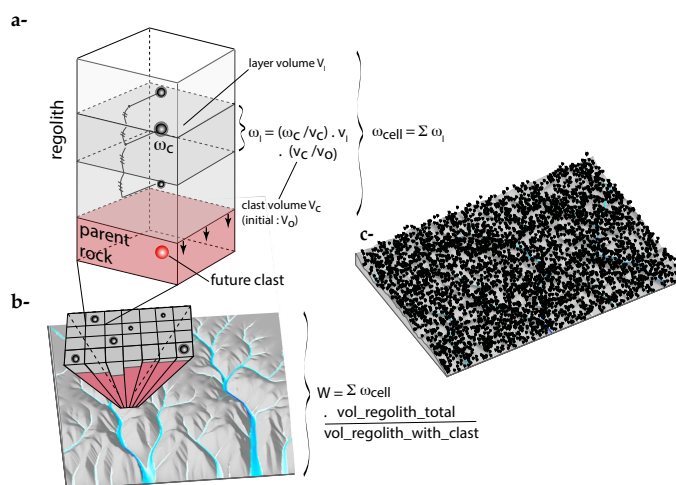

**Figure 2.** Calculation of the weathering outflux by integrating clast weathering at the cell and mountain scales.

(a) A regolith + bedrock soil column containing three clasts in the regolith at a particular time step. Three layers were defined with a size depending on the spacing between the clasts, which itself results either from an initial disposition in the bedrock or from the erosion-deposition history. The equations indicate how the integration at the layer and regolith scales proceeds. The same operation is done for deposits.  $w_c$ : clast weathering rate,  $w_l$ : layer weathering rate,  $w_{cell}$ : cell weathering rate, all [ $L^3/T$ ]. (b) Once completed the calculation of all  $w_{cell}$ , the mountain-scale weathering rate  $W$  [ $L^3/T$ ] is estimated by taking into account the spatial distribution of the clasts. (c) Example of the reference experiment WARM at 15 Ma where the clasts in green are actively dissolving, and the clasts in red are still in the fresh bedrock. Only half of the clasts (5000) are plotted here.

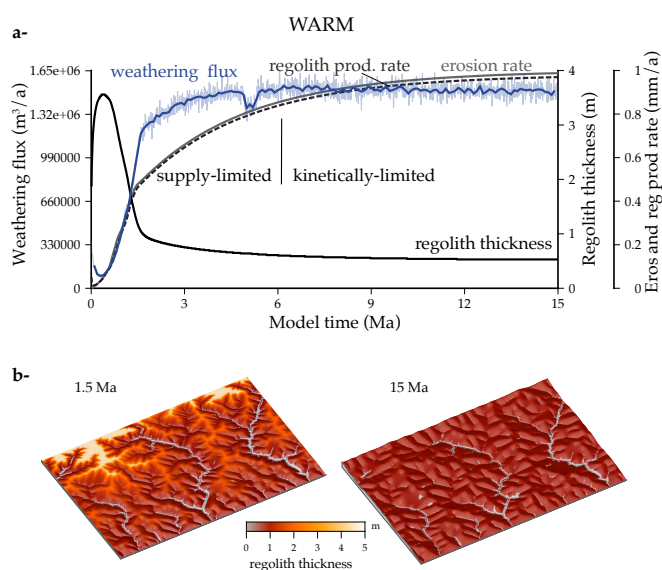

**Figure 3.** (a) Topography, regolith thickness, erosion and weathering flux evolutions in the reference experiment WARM. The thick weathering curve corresponds to a 0.1 Ma sliding window averaging. Variations in the weathering curve are mainly due to the stochastic transport of clasts. More clasts decrease this variability but do not change the mean values. The decrease near 5 Ma is due to a local hillslope collapse (Equation 5). Weathering becomes kinetically limited after  $\sim 6$  Ma when the erosion rate is too rapid to allow clasts to stay in the regolith for a long time (low Damköhler number  $N_{clast} = 0.003$ ). (b) Topography and regolith thickness at 1.5 and 15 Ma.

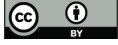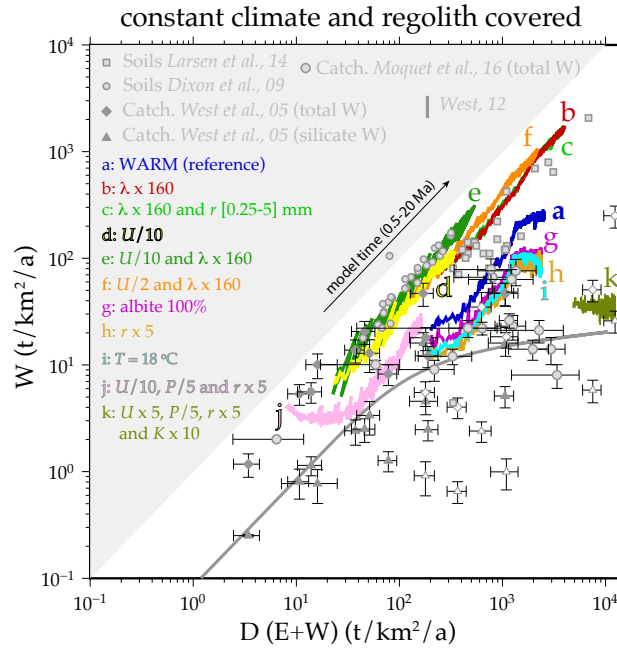

**Figure 4.** Comparison of the total denudation rate (physical erosion + weathering) in Cidre versus the weathering rate with data and West (2012)’s model. Grey symbols correspond to cratons and submontane domains covered by regolith (West et al., 2005). White symbols correspond to the bedrock-dominated alpine domains of West et al. (2005). Moquet et al. (2016)’s data are in the Andes and Amazonian basin. Data from Dixon et al. (2009b) are from Sierra Nevada, California. Data from Larsen et al. (2014) are from New Zealand. The Cidre simulations correspond to regolith covered mountains ( $N_{reg} > 1$ ). In order to convert the Cidre weathering and erosion rates in  $\text{t km}^{-2} \text{a}^{-1}$  a density of  $2.6 \text{ t m}^{-3}$  (albite) was used. There is no lateral erosion ( $\alpha = 0$ ). (a) Reference WARM model with uplift  $U = 1 \text{ mm/a}$ , precipitation  $P = 1 \text{ m/a}$ , temperature  $T = 25 \text{ }^\circ\text{C}$ , clast radius  $r = 1 \text{ mm}$ , albite (55%), quartz (30%) and biotite (15%), and mineral roughness  $\lambda = 1$ . Consequently  $N_{clast} = 0.003$  and  $N_{reg} = 1.7$ . (b)  $N_{clast} = 0.45$  and  $N_{reg} = 1.7$ . (c) Random initial distribution of  $r$  between 0.25 mm and 5 mm following a power law with exponent -3 and a mean of 1 mm.  $N_{clast} = 0.45$  and  $N_{reg} = 1.7$ . (d)  $N_{clast} = 0.09$  and  $N_{reg} = 17$ . (e)  $N_{clast} = 14$  and  $N_{reg} = 17$ . (f)  $N_{clast} = 1.5$  and  $N_{reg} = 3.4$ . (g)  $N_{clast} = 0.003$  and  $N_{reg} = 1.7$ . (h)  $N_{clast} = 0.0009$  and  $N_{reg} = 1.1$ . (i)  $N_{clast} = 0.0006$  and  $N_{reg} = 1.7$ . (j)  $N_{clast} = 0.002$  and  $N_{reg} = 3.4$ . (k)  $N_{clast} = 0.00001$  and  $N_{reg} = 1.1$ . The weathering rate is smaller for pure albite (g) than for a granitoid composition (a) because the reactive specific surface of the albite minerals (clast surface/mineral volume) is smaller in (g) than in (a).

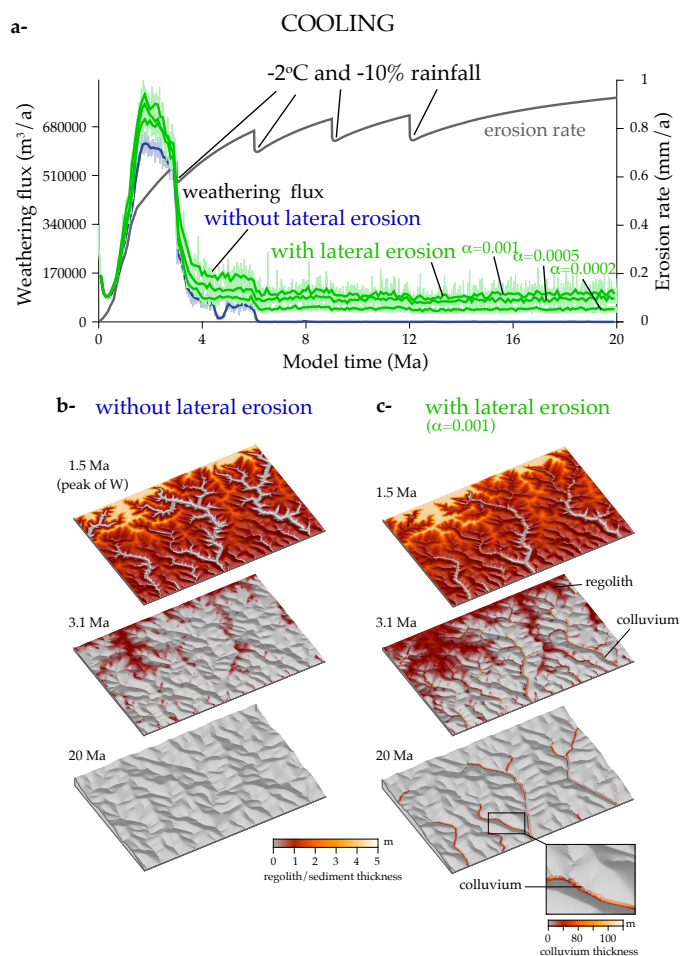

**Figure 5.** The COOLING experiment uses the same parameters as the reference experiment, WARM, but the climate is now cooling. The temperature decreases with elevation ( $-6^{\circ}\text{C km}^{-1}$ ), the sea level temperature  $T$  decreases by  $8^{\circ}\text{C}$  in four steps and the rainfall decreases by  $-5\%$  per degree of cooling. (a) Weathering flux evolution without lateral erosion and with lateral erosion for the reference model with uplift  $U = 1 \text{ mm/a}$ , precipitation  $P = 1 \text{ m/a}$ , initial temperature  $T = 25^{\circ}\text{C}$ , clast radius  $r = 1 \text{ mm}$ , albite (55%), quartz (30%) and biotite (15%), and mineral roughness  $\lambda = 1$ .  $\alpha$  is the lateral erosion parameter. (b) and (c) Topographic and regolith thickness evolutions at 1.5, 3.1 and 20 Ma. In (c), note the progressive transfer from the regolith reservoir on the hillslopes to the colluvium reservoir in the valleys, responsible for the constant weathering flux after 6 Ma in the case including lateral erosion.

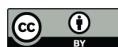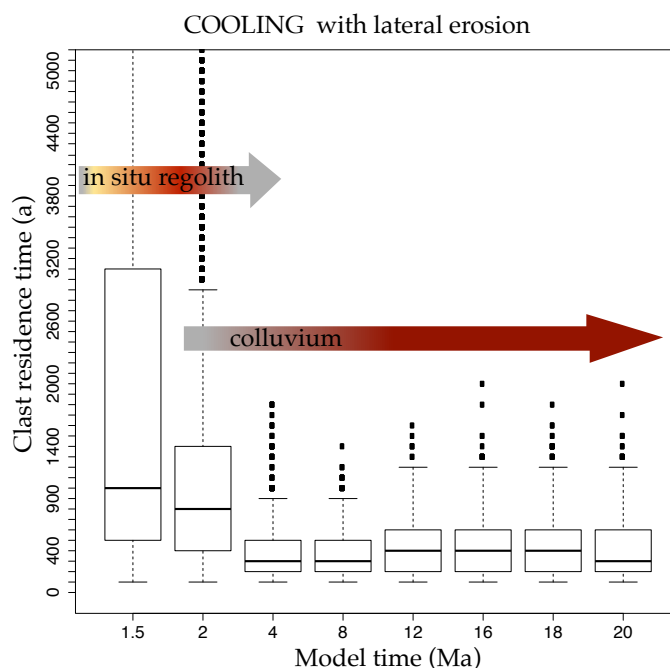

**Figure 6.** Distribution of the residence times for the clasts at different steps of the evolution in the COOLING experiment with lateral erosion (Figures 5a and c). The clast residence time is defined as the time during which a clast weathers (e.g. Dosseto et al., 2006; Mudd and Yoo, 2010), either in the regolith on the hillslopes, or in the colluvium. Note that the distribution is cut at 5 ka, but residence times of several 10 ka are present at 1.5 Ma, although they constitute much less than 1% of the clasts. After 6 Ma, the regolith has completely disappeared, so that the residence times represent the time spent after their detachment from the bedrock, i.e. primarily within the colluvium and possibly sediment temporarily deposited by the rivers. This distribution of the residence times gives an estimate of the colluvium residence times along the valleys. 99% of the residence times are smaller than 1.5 ka after 4 Ma. This distribution increases slightly after 6 Ma because the rainfall decreases. The increase in residence time compensates for the rainfall decrease to produce the nearly constant weathering outflux seen in Figure 5.

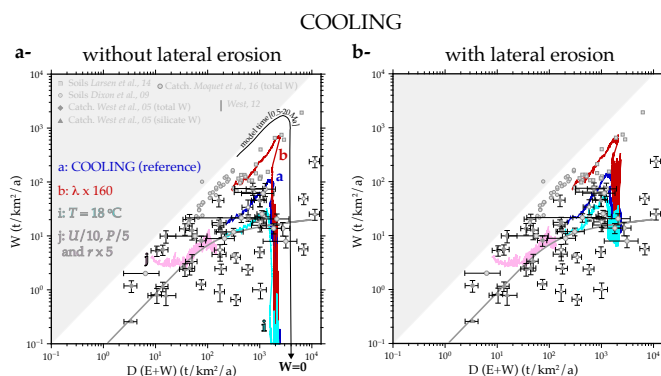

**Figure 7.** Different experiments with cooling climate. The temperature decreases with elevation ( $-6^\circ\text{C km}^{-1}$ ), the sea level temperature  $T$  decreases by  $8^\circ\text{C}$  in four steps and the rainfall decreases of  $-5\%$  per degree of cooling. Experiments a (COOLING), b, i and j use the same parameters as in Figure 4 but with a cooling climate. Without (a) and with ( $\alpha = 0.001$ ) (b) lateral erosion.

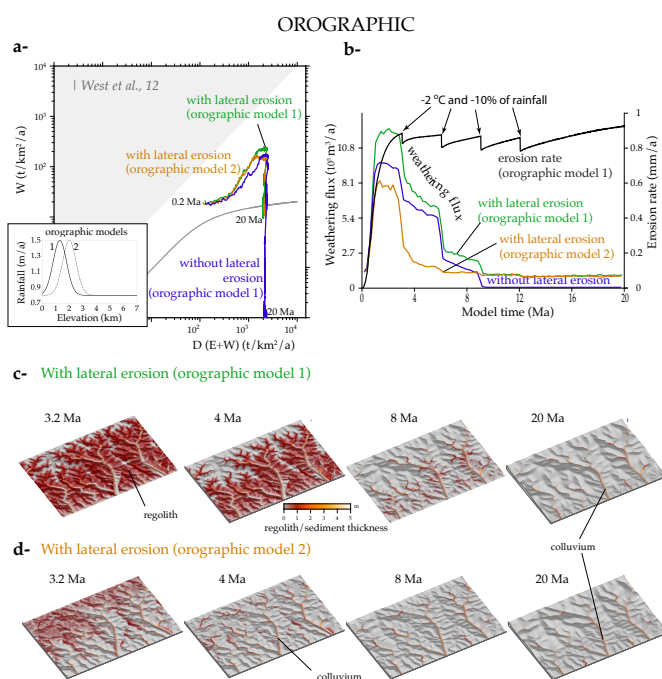

**Figure 8.** OROGRAPHIC experiment. A orographic-like precipitation peak is considered in addition to the parameters of the previous COOLING experiment. The erodibility coefficients are doubled in order to obtain comparable maximum elevations ( $K$  and  $\kappa$  in Equation 2). (a) Denudation-weathering evolution with and without lateral erosion for two orographic models with peaks at 1300 or 2000 m of elevation. (b) Erosion and weathering flux through time for the two orographic models. (c) Elevation and regolith/sediment cover evolution for the orographic model 1 with lateral erosion ( $\alpha = 0.001$ ). (d) The same for orographic model 2. The regolith legend applies to (c) and (d).

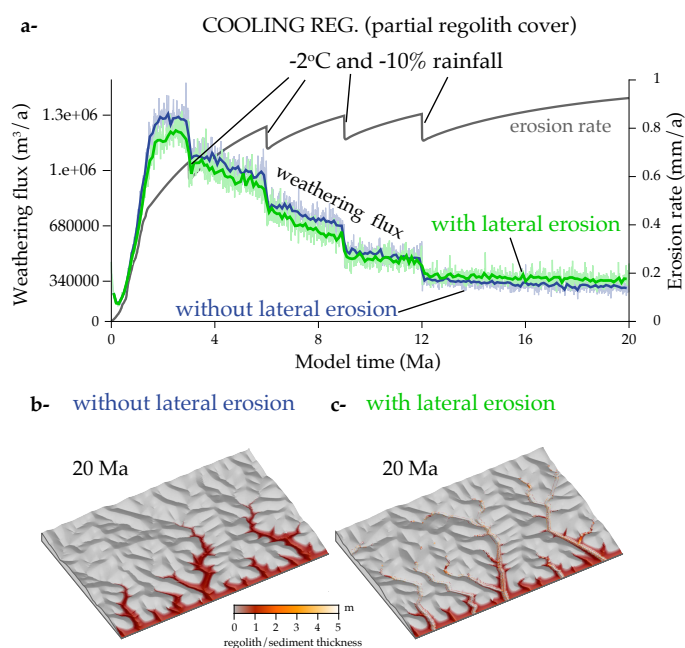

**Figure 9.** Experiments ending with a regolith covering the low elevations ( $< 1500$  m) and corresponding to a cooling climate. (a) Erosion and weathering flux through time for the models without and with lateral erosion. (b) and (c) Corresponding topography and regolith/sediment thickness at 20 Ma for the model with and without lateral erosion.

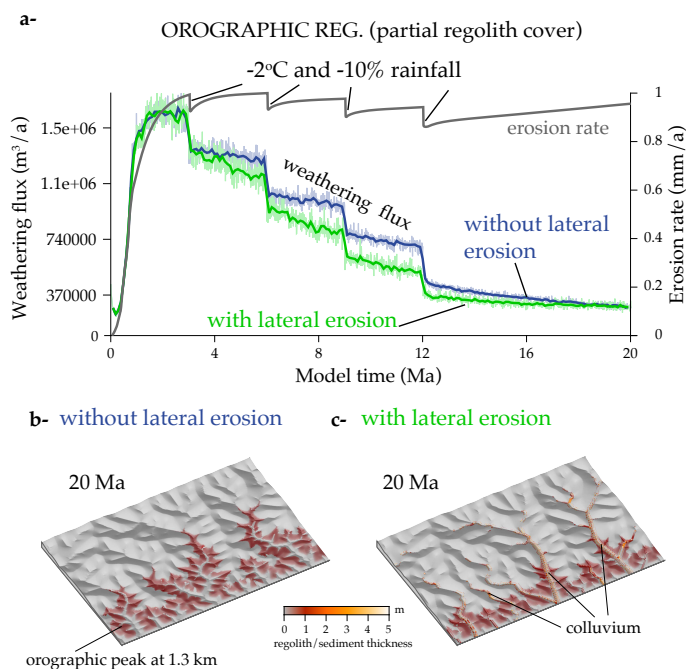

**Figure 10.** Same as Figure 9 (cooling ending with a regolith at elevations  $< 1500$  m), but the precipitations vary with elevation according to a gaussian curve with an elevation peak at 1300 m (orographic model 1 illustrated in Figure 8). The erodibility parameters (Equation 2) are also doubled to compensate for the smaller precipitation rate at high elevations and thus, to obtain comparable maximum elevations.

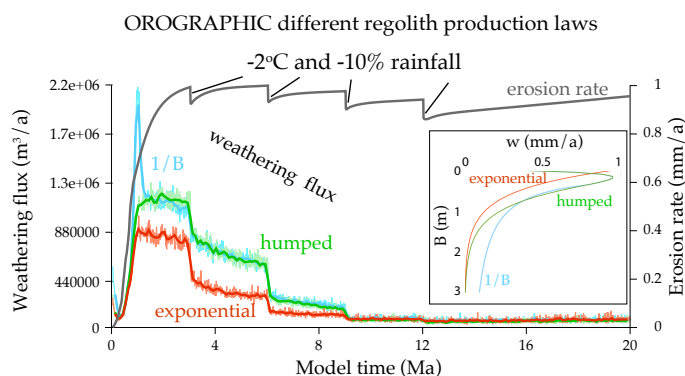

**Figure 11.** Effect of changing the regolith production law (inset diagram) in the OROGRAPHIC experiment with lateral erosion.

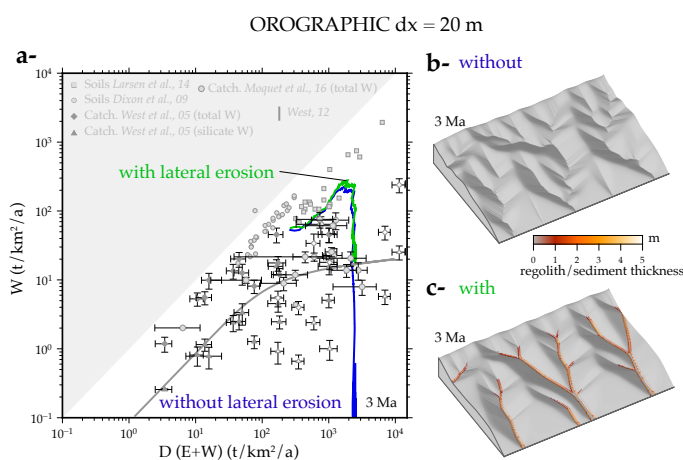

**Figure 12.** OROGRAPHIC experiments using a smaller cell size of 20 m (mountain size / 25). The mountain erosion increases faster than in other experiments. Thus the cooling and drying steps are applied at 0.5, 1, 1.5 and 2 Ma. The final maximum elevation at 3 Ma is 1200 m. The precipitation rate is thus maximum at mountain top (orographic model 1 illustrated in Figure 8). (a) Weathering rate for the experiment with and without lateral erosion. (b) topography and regolith/sediment thickness at 3 Ma in the case without lateral erosion. (c) The same for the case with lateral erosion, showing the colluvium in valleys. Relief x 2.



| Param                                   | WARM   | COOLING | OROGRAPHIC | COOLING<br>REG. | OROGRAPHIC<br>REG. | OROGRAPHIC<br>Exponential | OROGRAPHIC<br>dx = 20 m |
|-----------------------------------------|--------|---------|------------|-----------------|--------------------|---------------------------|-------------------------|
| $k_w$ (m a <sup>-1</sup> )              | 3e-3   | 3e-3    | 3e-3       | 5e-3            | 5e-3               | 1.7e-3                    | 3e-3                    |
| $k_1$                                   | 0.8    | 0.8     | 0.8        | 0.8             | 0.8                | 0.                        | 0.8                     |
| $T$ (°C)                                | 25     | 17      | 17         | 17              | 17                 | 17                        | 17                      |
| $K$ (reg.) (a <sup>-0.5</sup> )         | 2.5e-5 | 2.5e-5  | 5e-5       | 2.5e-5          | 5e-5               | 5e-5                      | 5e-5                    |
| $K$ (bedrock) (a <sup>-0.5</sup> )      | 1.5e-5 | 1.5e-5  | 3e-5       | 1.5e-5          | 3e-5               | 3e-5                      | 3e-5                    |
| $\kappa$ (reg.) (m a <sup>-1</sup> )    | 1e-4   | 1e-4    | 2e-4       | 1e-4            | 2e-4               | 2e-4                      | 5e-3                    |
| $\kappa$ (bedrock) (m a <sup>-1</sup> ) | 1e-4   | 1e-4    | 2e-4       | 1e-4            | 2e-4               | 2e-4                      | 5e-3                    |
| $P$ (m a <sup>-1</sup> )                | 1      | 0.65    | 0.53       | 0.65            | 0.53               | 0.53                      | 0.53                    |
| $N_{riv}$                               | 5      | 6       | 10         | 6               | 10                 | 10                        | 7                       |
| $N_{depo}$                              | 10     | 15      | 19         | 15              | 19                 | 19                        | 19                      |
| $N_{hill}$                              | 7e-3   | 1e-2    | 1.7e-2     | 1e-2            | 1.7e-2             | 1.7e-2                    | 6e-2                    |
| $N_{reg}$                               | 1.7    | 0.6     | 0.6        | 1.1             | 1.                 | 0.5                       | 0.5                     |
| $N_{clast}$                             | 3e-3   | n. d.   | n. d.      | 5e-4            | 3e-4               | n. d.                     | n. d.                   |

**Table 1.** Parameters for the main simulations. Other common parameters are:  $U = 1$  mm a<sup>-1</sup>,  $r = 1$  mm.  $E_a = 66000$  J mol<sup>-1</sup> (albite), 85000 (quartz) and 35000 (biotite).  $k_m = 10^{-12.26}$  mol m<sup>-2</sup> s<sup>-1</sup> (albite),  $10^{-13.39}$  (quartz) and  $10^{-10.88}$  (biotite).  $V_m = 1.002 \cdot 10^{-4}$  m<sup>3</sup> mol<sup>-1</sup> (albite),  $2.269 \cdot 10^{-4}$  (quartz) and  $1.5487 \cdot 10^{-4}$  (biotite).  $S_c = 0.84$ ,  $k_1 = 0.8$ ,  $d_1 = 0.5$  m,  $d_2 = 0.1$  m. For experiments with lateral erosion  $\alpha = 1e-3$  for loose material except in "OROGRAPHIC dx = 20 m" where  $\alpha = 5e-3$ ,  $\xi = 0.1$  a m<sup>-1</sup>. The values of  $P$  and  $T$ , as well as the non dimensional numbers are given for  $z = 0$  m at the end of the simulation. n. d.: not defined
